# Supplementary material for: Adsorption behavior of the copolymer AM/DMC/APEG/DMAAC-16 on a carbonate rock and its application for acidizing
Source: Royal Society of Chemistry journal article supplement (doi:10.1039/c7ra04069e), 2017-01-01
Supplement: c7ra04069e1.pdf [file c7ra04069e1.pdf]

## **Adsorption Behavior of Copolymer AM/DMC/APEG/DMAAC- 16 on Carbonate Rock and Its Application for Acidizing**

Hongping Quan <sup>a, b</sup>, Zhonghao Chen <sup>a, b</sup>, Yang Wu <sup>\*, a, b</sup>, Zhuoke Li <sup>a, b</sup>

a. College of chemistry and chemical engineering, Southwest Petroleum University, Chengdu, P. R. of China

b. Oil & Gas Field Applied Chemistry Key Laboratory of Sichuan Province, Southwest Petroleum University, Chengdu, P. R. China.

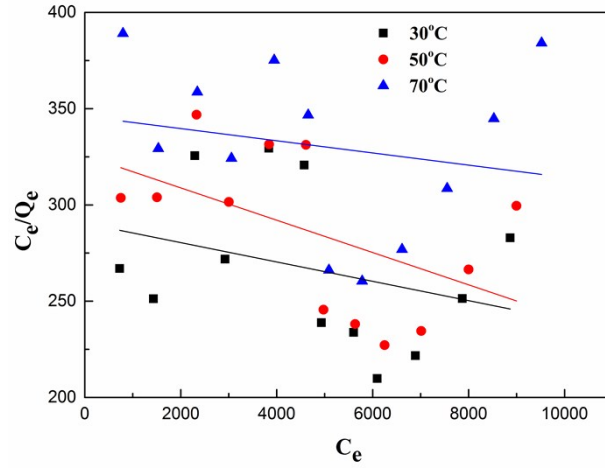

**Fig. S1.** Langmuir isotherms for PADAD adsorbed on carbonate rock.

**Table S1.** Langmuir parameters for PADAD adsorbed on carbonate rock.

| Temperature<br>(°C) | Langmuir equation       | R <sup>2</sup> |
|---------------------|-------------------------|----------------|
| 30                  | $y = -0.0083x + 301.07$ | 0.1986         |
| 50                  | $y = -0.0084x + 325.65$ | 0.2667         |
| 70                  | $y = -0.0032x + 346.01$ | 0.0384         |

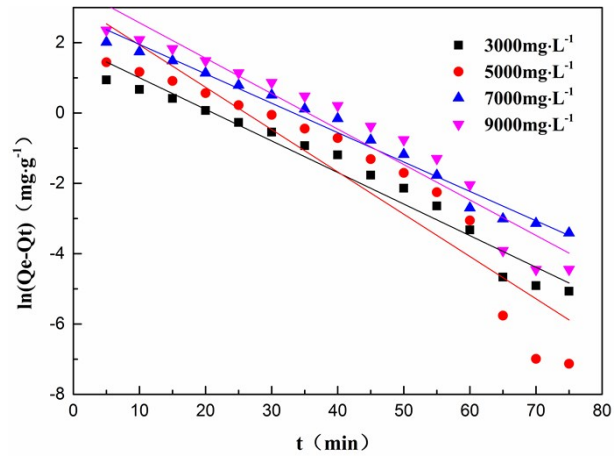

**Fig. S2.** Pseudo-first-order equation for the adsorption kinetics of PADAD on carbonate rock at different initial concentration

**Table S2.** Kinetic parameters for the Pseudo-first-order equation

| Initial concentration<br>(mg · L <sup>-1</sup> ) | Q <sub>e</sub><br>(mg · g <sup>-1</sup> ) | Kinetics equation | R <sub>1</sub> <sup>2</sup> | Q <sub>e,1</sub><br>(mg · g <sup>-1</sup> ) | k <sub>1</sub><br>(min <sup>-1</sup> ) |
|--------------------------------------------------|-------------------------------------------|-------------------|-----------------------------|---------------------------------------------|----------------------------------------|
| 3000                                             | 7.0494                                    | y=-0.0898x+1.9015 | 0.9626                      | 6.6959                                      | 0.2068                                 |
| 5000                                             | 11.6421                                   | y=-0.1203x+3.1390 | 0.8787                      | 23.0808                                     | 0.2771                                 |
| 7000                                             | 20.6587                                   | y=-0.0836x+2.7871 | 0.9817                      | 16.2339                                     | 0.1925                                 |
| 9000                                             | 29.0481                                   | y=-0.1008x+3.5753 | 0.9337                      | 35.7053                                     | 0.2321                                 |

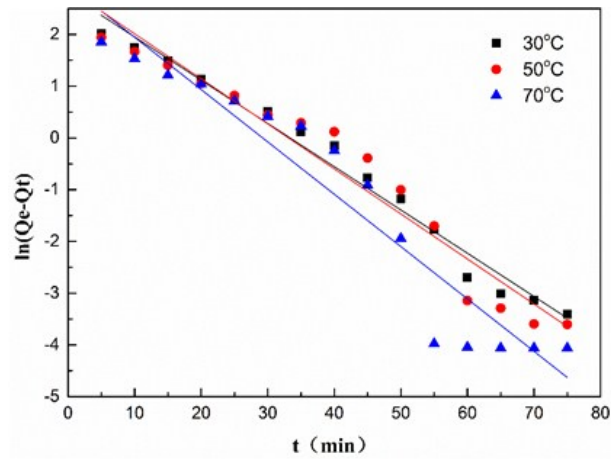

**Fig. S3.** Pseudo-first-order equation for the adsorption kinetics of PADAD on carbonate rock at different temperature

**Table S3.** Kinetic parameters for the Pseudo-first-order equation at different temperature

| Temperature<br>(°C) | $Q_e$<br>( $\text{mg} \cdot \text{g}^{-1}$ ) | Kinetics equation       | $R_1^2$ | $Q_{e,1}$<br>( $\text{mg} \cdot \text{g}^{-1}$ ) | $k_1$<br>( $\text{min}^{-1}$ ) |
|---------------------|----------------------------------------------|-------------------------|---------|--------------------------------------------------|--------------------------------|
| 30                  | 20.6587                                      | $y = -0.0836x + 2.7871$ | 0.9817  | 16.2339                                          | 0.1925                         |
| 50                  | 20.2566                                      | $y = -0.0870x + 2.8816$ | 0.9480  | 17.8428                                          | 0.2004                         |
| 70                  | 19.1412                                      | $y = -0.1011x + 2.9569$ | 0.9222  | 19.2382                                          | 0.2328                         |
